# Supplementary material for: Utility and safety of airway stenting in airway stenosis after lung transplant: A systematic review
Source: PubMed Central journal article supplement (PMC10034355; doi:10.3389/fmed.2023.1061447), 2023-03-09
Supplement: Image_1.pdf [file Image_1.pdf]

## Supplementary figure 1

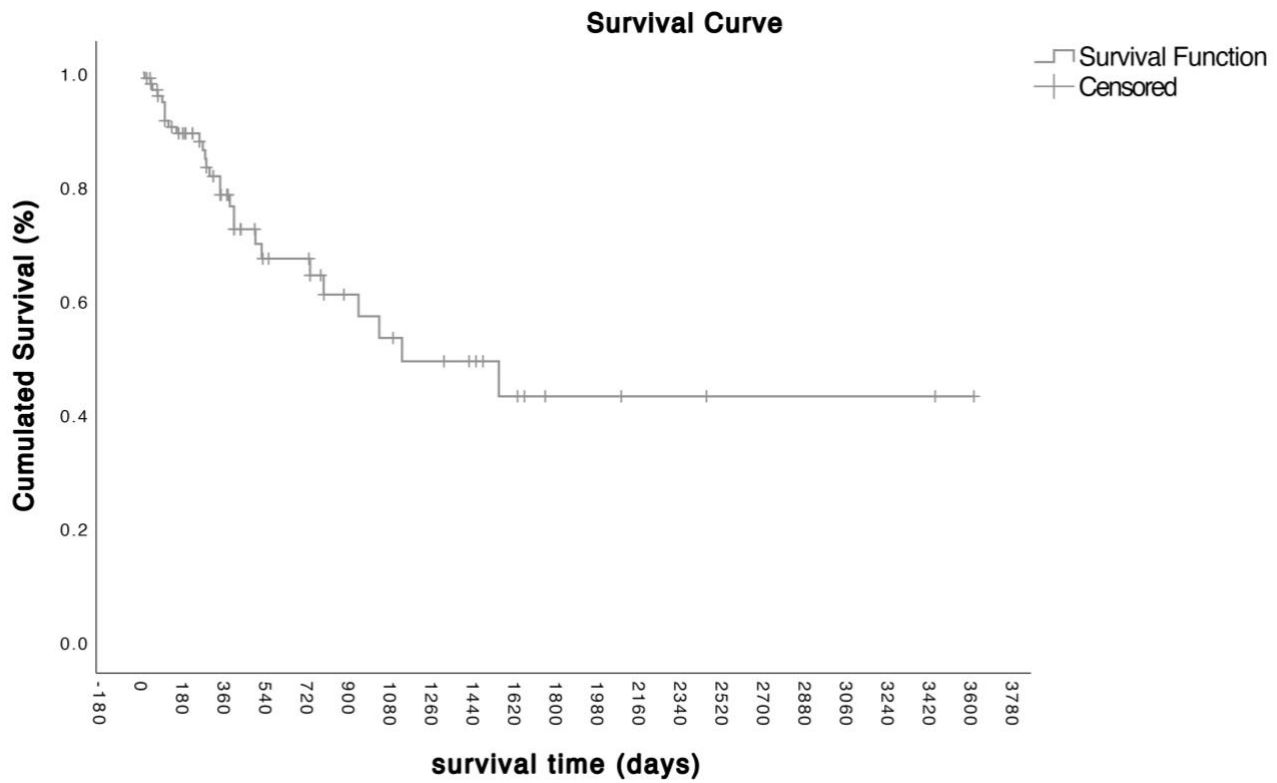

Supplementary figure 1. Kaplan-Meier estimate survival curve in patients undergoing stent insertion among the seven studies. The median of overall survival time is 1124 (95% confidence interval 415 to 1833) days.
